# Supplementary material
Source: PubMed Central journal article supplement (PMC4794019)
Supplement: yory022746.ww1_default.pdf [file yory022746.ww1_default.pdf]

Appendix 1: Definitions used for assessing the risk of bias in individual randomised controlled trials.

| Domain                                        | Risk of bias | Definition                                                                                                                                                                                                                                                                                                                                                                                                                                                                                                                                                                                                                                                                                               |
|-----------------------------------------------|--------------|----------------------------------------------------------------------------------------------------------------------------------------------------------------------------------------------------------------------------------------------------------------------------------------------------------------------------------------------------------------------------------------------------------------------------------------------------------------------------------------------------------------------------------------------------------------------------------------------------------------------------------------------------------------------------------------------------------|
| <b>Sequence generation</b>                    | Low          | <ul style="list-style-type: none"> <li>- Random number table</li> <li>- Computer random-number generator</li> <li>- Coin tossing</li> <li>- Shuffling cards or envelopes</li> <li>- Minimization</li> </ul>                                                                                                                                                                                                                                                                                                                                                                                                                                                                                              |
|                                               | High         | <ul style="list-style-type: none"> <li>- Sequence generated by odd or date of birth or date of admission</li> </ul>                                                                                                                                                                                                                                                                                                                                                                                                                                                                                                                                                                                      |
|                                               | Unclear      | <ul style="list-style-type: none"> <li>- Method used to generate sequence of randomisation not reported</li> </ul>                                                                                                                                                                                                                                                                                                                                                                                                                                                                                                                                                                                       |
| <b>Allocation concealment</b>                 | Low          | <ul style="list-style-type: none"> <li>- Central allocation</li> <li>- Sequentially numbered drug containers of identical appearance</li> <li>- Sequentially numbered, opaque, sealed envelopes</li> </ul>                                                                                                                                                                                                                                                                                                                                                                                                                                                                                               |
|                                               | High         | <ul style="list-style-type: none"> <li>- Predictable assignment (date of birth, alternation, open random allocation schedule, unsealed envelopes)</li> </ul>                                                                                                                                                                                                                                                                                                                                                                                                                                                                                                                                             |
|                                               | Unclear      | <ul style="list-style-type: none"> <li>- Method to maintain allocation concealment not reported</li> </ul>                                                                                                                                                                                                                                                                                                                                                                                                                                                                                                                                                                                               |
| <b>Blinding of participants and personnel</b> | Low          | <ul style="list-style-type: none"> <li>- Blinding of participants and key study personnel ensured, and unlikely that the blinding could have been broken</li> <li>- Either participants or some key personnel were not blinded but outcome assessment was blinded and the non-blinding of others unlikely to introduce bias</li> </ul>                                                                                                                                                                                                                                                                                                                                                                   |
|                                               | High         | <ul style="list-style-type: none"> <li>- No blinding or incomplete blinding and the outcome measurement is likely to be influenced by lack of blinding (i.e., subjective outcome)</li> <li>- Blinding of participants and personnel attempted but likely that the blinding could have been broken (differences in co-interventions among groups)</li> <li>- Either participants or personnel were not blinded, and the non-blinding likely to introduce bias</li> </ul>                                                                                                                                                                                                                                  |
|                                               | Unclear      | <ul style="list-style-type: none"> <li>- Insufficient information to permit judgement of “low risk” or “high risk”</li> <li>- Insufficient information about co-interventions to assess whether lack of blinding or incomplete blinding was likely to influence the outcome</li> </ul>                                                                                                                                                                                                                                                                                                                                                                                                                   |
| <b>Blinding of outcome assessment</b>         | Low          | <ul style="list-style-type: none"> <li>- No blinding but objective outcome (i.e., mortality, biological tests)</li> <li>- Blinding of outcome assessor and unlikely that the blinding could have been broken</li> </ul>                                                                                                                                                                                                                                                                                                                                                                                                                                                                                  |
|                                               | High         | <ul style="list-style-type: none"> <li>- No blinding or incomplete blinding and the outcome measurement is likely to be influenced by lack of blinding (i.e., subjective outcome)</li> <li>- Blinding of outcome assessment, but likely that the blinding could have been broken, and the outcome measurement is likely to be influenced by lack of blinding</li> </ul>                                                                                                                                                                                                                                                                                                                                  |
|                                               | Unclear      | <ul style="list-style-type: none"> <li>- Insufficient information regarding outcome assessment blinding</li> </ul>                                                                                                                                                                                                                                                                                                                                                                                                                                                                                                                                                                                       |
| <b>Incomplete outcome data</b>                | Low          | <ul style="list-style-type: none"> <li>- No missing outcome data</li> <li>- Missing data have been imputed using appropriate methods (worst-case analysis)</li> <li>- Missing data balanced in numbers across intervention groups with similar reasons for missing data across groups</li> <li>- The proportion of missing outcomes compared with observed event risk not enough to have a clinically relevant impact on the intervention effect estimate (&lt; 10% of the number of patients randomised or &lt; the number of outcomes)</li> </ul>                                                                                                                                                      |
|                                               | High         | <ul style="list-style-type: none"> <li>- Reason for missing outcome data likely to be related to true outcome, with either imbalance in numbers or reasons for missing data across intervention groups</li> <li>- The proportion of missing outcomes compared with observed event risk enough to induce clinically relevant bias in intervention effect estimate (<math>\geq 10\%</math> of patients randomised or <math>\geq</math> the number of outcomes)</li> <li>- As-treated analysis performed with substantial departure of the intervention received from that assigned at randomisation (<math>\geq 10\%</math> of patients randomised or <math>\geq</math> the number of outcomes)</li> </ul> |
|                                               | Unclear      | <ul style="list-style-type: none"> <li>- Insufficient reporting of attrition/exclusion (i.e., number of participants randomised and analysed not stated, no reason for missing data provided)</li> </ul>                                                                                                                                                                                                                                                                                                                                                                                                                                                                                                 |
