# Supplementary material
Source: PubMed Central journal article supplement (PMC4794019)
Supplement: yory022746.ww3_default.pdf [file yory022746.ww3_default.pdf]

Appendix 3: Agreement by domain between the risk of bias assessment made by the review authors and our re-assessment.

| <b>Re-assessed risk of bias, by domain n (%*)</b>                |                 |                         |                 |
|------------------------------------------------------------------|-----------------|-------------------------|-----------------|
| <b>Initial risk of bias, by domain</b>                           |                 |                         |                 |
| <b>Random sequence generation (selection bias)</b>               | Low (n=93)      | Unclear (n=93)          | High (n=14)     |
| Low (n=82)                                                       | <b>79 (96)</b>  | 3 (4)                   | 0 (0)           |
| Unclear (n=102)                                                  | 13 (13)         | <b>89 (87)</b>          | 0 (0)           |
| High (n=16)                                                      | 1 (6)           | 1 (6)                   | <b>14 (88)</b>  |
| <b>Agreement</b>                                                 |                 | <b>0.91 (0.88-0.95)</b> |                 |
| <b>Allocation concealment (selection bias)</b>                   | Low (n=73)      | Unclear (n=114)         | High (n=16)     |
| Low (n=65)                                                       | <b>64 (98)</b>  | 1 (2)                   | 0 (0)           |
| Not evaluated (n=1)                                              | 0 (0)           | 1 (100)                 | 0 (0)           |
| Unclear (n=112)                                                  | 4 (4)           | <b>108 (96)</b>         | 0 (0)           |
| High (n=22)                                                      | 2 (9)           | 4 (18)                  | <b>16 (73)</b>  |
| <b>Agreement</b>                                                 |                 | <b>0.95 (0.93-0.98)</b> |                 |
| <b>Blinding of participants and personnel (performance bias)</b> | Low (n=69)      | Unclear (n=49)          | High (n=82)     |
| Low (n=43)                                                       | <b>43 (100)</b> | 0 (0)                   | 0 (0)           |
| Not evaluated (n=3)                                              | 1 (33)          | 1 (33)                  | 1 (33)          |
| Unclear (n=25)                                                   | 10 (40)         | <b>14 (56)</b>          | 1 (4)           |
| High (n=129)                                                     | 15 (12)         | 34 (26)                 | <b>80 (62)</b>  |
| <b>Agreement</b>                                                 |                 | <b>0.69 (0.61-0.74)</b> |                 |
| <b>Blinding of outcome assessment (detection bias)</b>           | Low (n=112)     | Unclear (n=33)          | High (n=55)     |
| Low (n=70)                                                       | <b>66 (94)</b>  | 0 (0)                   | 4 (6)           |
| Not evaluated (n=3)                                              | 1 (33)          | 1 (33)                  | 1 (33)          |
| Unclear (n=45)                                                   | 15 (33)         | <b>25 (56)</b>          | 5 (11)          |
| High (n=82)                                                      | 30 (37)         | 7 (9)                   | <b>45 (55)</b>  |
| <b>Agreement</b>                                                 |                 | <b>0.69 (0.63-0.75)</b> |                 |
| <b>Incomplete outcome data (attrition bias)</b>                  | Low (n=96)      | Unclear (n=36)          | High (n=68)     |
| Low (n=83)                                                       | <b>75 (90)</b>  | 2 (2)                   | 6 (7)           |
| Not evaluated (n=7)                                              | 2 (29)          | 5 (71)                  | 0 (0)           |
| Unclear (n=37)                                                   | 8 (22)          | <b>21 (57)</b>          | 8 (22)          |
| High (n=73)                                                      | 11 (15)         | 8 (11)                  | <b>54 (74)</b>  |
| <b>Agreement</b>                                                 |                 | <b>0.78 (0.72-0.84)</b> |                 |
| <b>Trial Level</b>                                               |                 |                         |                 |
| At least 1 domain at risk                                        | Low (n=7)       | Unclear (n=51)          | High (n=142)    |
| High (n=200)                                                     | 7 (4)           | 51 (26)                 | <b>142 (71)</b> |
| <b>Agreement</b>                                                 |                 | <b>0.71 (0.64-0.77)</b> |                 |

\* Percentages are calculated by row
