# Supplementary material
Source: PubMed Central journal article supplement (PMC4794019)
Supplement: yory022746.ww4_default.pdf [file yory022746.ww4_default.pdf]

Appendix 4: Examples of methodological problems that could not be corrected.

| <b>Study Id</b>   | <b>Intervention</b>                                                        | <b>Contol</b>                                                                                                                                                            | <b>Assessed outcome</b> | <b>Blinding of patients/ care providers</b>                                         | <b>Methodological issue related to blinding of patients/ care providers</b>                                                                                                                                                                                                                                                                                   |
|-------------------|----------------------------------------------------------------------------|--------------------------------------------------------------------------------------------------------------------------------------------------------------------------|-------------------------|-------------------------------------------------------------------------------------|---------------------------------------------------------------------------------------------------------------------------------------------------------------------------------------------------------------------------------------------------------------------------------------------------------------------------------------------------------------|
| Bujko<br>2006     | Preoperative irradiation for rectal cancer                                 | Radiochemotherapy, with two courses of 5-fluorouracil and leucovorin prior surgery                                                                                       | Local recurrence        | No blinding                                                                         | No blinding, treatments with very frequent and clinically specific side effects: when some people receive chemotherapeutic agents and some do not we considered that this can be a potential source of bias, and due to the very specific and frequent side effect of chemotherapy this problem was thus impossible to solve with a methodological adjustment |
| Gerard<br>2006    | Preoperative radiotherapy in resectable T3-4, Nx, M0 rectal adenocarcinoma | Preoperative radiotherapy , and chemotherapy with fluorouracil and leucovorin, in resectable T3-4, Nx, M0 rectal adenocarcinoma                                          | Local recurrence        | No blinding                                                                         | No blinding, treatments with very frequent and clinically specific side effects: when some people receive chemotherapeutic agents and some do not we considered that this can be a potential source of bias, and due to the very specific and frequent side effect of chemotherapy this problem was thus impossible to solve with a methodological adjustment |
| Blackburn<br>1981 | Interruption of tranquilizing medication among schizophrenics patients     | Patients usual treatment was replaced by placebo tablets, as placebo was physically different from the regular treatment, patients were told they were under a new drug. | Relapse, at anytime     | Placebo was used (named CAT)                                                        | Double, thiamine chloride was used as placebo, participants and nurses were told that a new medication was given, but "It was noted, however, that nursing personnel were soon referring to CAT as a placebo"                                                                                                                                                 |
| Morton<br>1968    | Chlorpromazine or trifluoperazine withdrawal in chronic schizophrenia      | Patients' usual treatment was replaced by placebo tablets. Placebo was identical tablets, with no taper period                                                           | Relapse, at anytime     | Placebo was used. Identical tablets, prepared by the hospital pharmacist, were used | Trial authors reported that nurses made correct guesses as to who was on drug and who was on placebo.                                                                                                                                                                                                                                                         |
